# Supplementary material for: Genome-wide analysis of mutations in mutant lineages selected following fast-neutron irradiation mutagenesis of Arabidopsis thaliana
Source: HighWire-hosted journal article supplement (doi:10.1101/gr.131474.111), 2012-04-12
Supplement: Supplemental_Figure_1.pdf [file Supplemental_Figure_1.pdf]

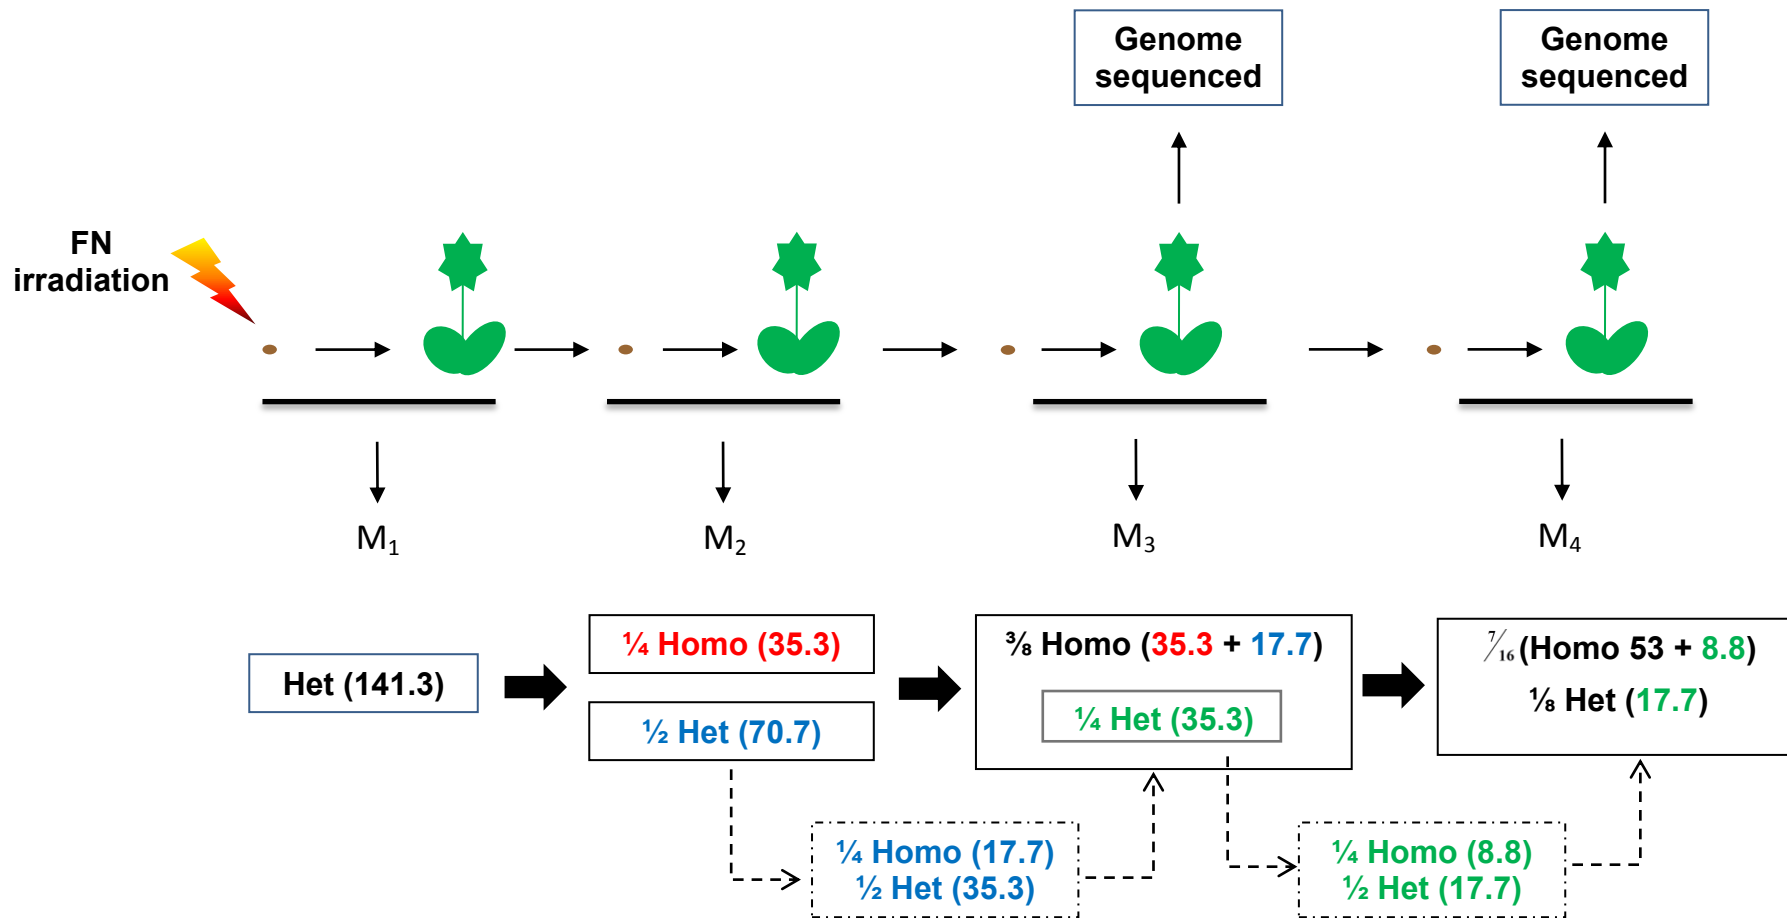

**Supplemental Figure 1.** Estimation of numbers of mutations in E99 and E125 M<sub>4</sub> plants. To assist in the determination of the spontaneous mutation rate calculation in our FN-exposed mutant lines we genome sequenced the progeny of two individual M<sub>4</sub> plants (progeny of E99 and

E125 genome-sequenced M<sub>3</sub> lines) and compared the number of predicted homozygous M<sub>4</sub> mutations to the number of observed M<sub>4</sub> mutations identified in E99 and E125 DNA sequencing datasets. Mendelian segregation laws were used to estimate the number of variants, both homozygous (Homo) and heterozygous (Het) in the preceding generations of E99 and E125 M<sub>3</sub> mutant lines genomes sequenced. As shown, all ‘fixed’ homozygous mutations in the M<sub>2</sub> (in red text) would have passed onto the subsequent M<sub>3</sub> generations. In addition, a quarter of the heterozygous mutations (70.7; blue text) in the M<sub>2</sub> lines would have segregated in a Mendelian 1:2:1 (homozygous mutation:heterozygous mutation:homozygous non-mutant) ratio, becoming homozygous (17.7; blue text) in the following generation. A total of 53 homozygous variants along with a further 35.3 segregating heterozygous variants (green text) are predicted in the M<sub>3</sub> generations. In the M<sub>4</sub> generation, a further 8.8 homozygous variants (green text) are predicted following segregation (in a Mendelian 1:2:1 ratio) of the M<sub>3</sub> heterozygous variants in addition to 17.7 heterozygous mutations (green text). In the original FN exposed M<sub>1</sub> lines a total of 141.3 (black text) heterozygous mutations are predicted to have been FN-induced and a quarter of these should become homozygous in the M<sub>2</sub> generation (35.3; red text), half becoming heterozygous (70.7; blue text) and a quarter would be the original DNA sequence. The numbers of predicted and observed mutations in E99 and E125 lines in the M<sub>3</sub> and M<sub>4</sub> generations are summarized in Supplemental Table 4.
