# Supplementary material for: Genome-wide analysis of mutations in mutant lineages selected following fast-neutron irradiation mutagenesis of Arabidopsis thaliana
Source: HighWire-hosted journal article supplement (doi:10.1101/gr.131474.111), 2012-04-12
Supplement: Supplemental_Table_4.pdf [file Supplemental_Table_4.pdf]

| Line  | M <sub>3</sub> homozygous mutations observed | M <sub>3</sub> heterozygous mutations predicted | M <sub>4</sub> homozygous mutations observed | M <sub>4</sub> homozygous mutations predicted |
|-------|----------------------------------------------|-------------------------------------------------|----------------------------------------------|-----------------------------------------------|
| E99   | 21                                           | 14                                              | 3                                            | 3.5                                           |
| E125  | 32                                           | 21.3                                            | 4                                            | 5.3                                           |
| Total | 53                                           | 35.3                                            | 7                                            | 8.8                                           |

**Supplemental Table 4.** The predicted and observed numbers of mutations identified in two FN mutagenized M<sub>3</sub> and M<sub>4</sub> *Arabidopsis* lines. The numbers of observed homozygous mutations identified in E99 and E125 M<sub>3</sub> (see Table 1) sequencing datasets are shown in the second column. Based on these numbers the predicted Mendelian number (two thirds; see Supplemental Figure 1) of heterozygous mutations in the E99 and E125 M<sub>3</sub> FN lines are shown in the third column. The numbers of novel homozygous mutations observed in E99 and E125 M<sub>4</sub> genome sequencing datasets (see Supplemental Table 3) are shown in the fourth column and almost match the total predicted Mendelian number (a quarter of the predicted M<sub>3</sub> heterozygous mutations; column 3) of M<sub>4</sub> homozygous mutations (fifth column; see Supplemental Figure 1).
