# Supplementary material for: Genome-wide analysis of mutations in mutant lineages selected following fast-neutron irradiation mutagenesis of Arabidopsis thaliana
Source: HighWire-hosted journal article supplement (doi:10.1101/gr.131474.111), 2012-04-12
Supplement: Supplemental_Table_7.pdf [file Supplemental_Table_7.pdf]

| FN Line                | Illumina paired-end read length (bp) | Raw sequencing data                         |                                 |                       | Aligned sequencing data                     |                                 |                       |
|------------------------|--------------------------------------|---------------------------------------------|---------------------------------|-----------------------|---------------------------------------------|---------------------------------|-----------------------|
|                        |                                      | Number of reads                             | Total number of bases sequenced | Genome fold coverage* | Number of Reads                             | Total number of bases sequenced | Genome fold coverage* |
| F <sub>2</sub> -1      | 90                                   | 34,283,104                                  | 3,085,479,360                   | 25.8                  | 22,902,760                                  | 2,061,248,400                   | 17.2                  |
| F <sub>2</sub> -2      | 90                                   | 34,490,180                                  | 3,104,116,200                   | 25.9                  | 23,405,658                                  | 2,106,509,220                   | 17.6                  |
| F <sub>2</sub> -3      | 90                                   | 35,115,388                                  | 3,160,384,920                   | 26.4                  | 23,468,808                                  | 2,112,192,720                   | 17.7                  |
| E71 (M <sub>3</sub> )  | 75                                   | 62,395,014                                  | 4,679,626,050                   | 39.1                  | 42,804,110                                  | 3,210,308,250                   | 26.8                  |
| E99 (M <sub>3</sub> )  | 75                                   | 64,339,922                                  | 4,825,494,150                   | 40.3                  | 44,727,908                                  | 3,354,593,100                   | 28.0                  |
| E125 (M <sub>3</sub> ) | 51                                   | 99,141,632                                  | 5,056,223,232                   | 42.3                  | 70,754,626                                  | 3,608,485,926                   | 30.2                  |
| E128 (M <sub>3</sub> ) | 75                                   | 38,859,106                                  | 2,914,432,950                   | 24.4                  | 27,575,704                                  | 2,068,177,800                   | 17.3                  |
| E138 (M <sub>3</sub> ) | 75                                   | 61,425,202                                  | 4,606,890,150                   | 38.5                  | 42,935,852                                  | 3,220,188,900                   | 26.9                  |
| E216 (M <sub>3</sub> ) | 51                                   | 113,915,698                                 | 5,809,700,598                   | 48.6                  | 77,689,046                                  | 3,962,141,346                   | 33.1                  |
| E99 (M <sub>4</sub> )  | 101                                  | 82,128,064                                  | 8,294,934,464                   | 69.3                  | 51,187,102                                  | 5,169,897,302                   | 43.2                  |
| E125 (M <sub>4</sub> ) | 101                                  | 80,463,600                                  | 8,126,823,600                   | 67.9                  | 50,895,650                                  | 5,140,460,650                   | 43.0                  |
| Progenitor             | 36,<br>75<br>and 76                  | 83,936,186,<br>63,810,862 and<br>30,731,742 | 10,143,129,738                  | 84.8                  | 59,184,147,<br>45,247,612 and<br>18,127,179 | 6,901,865,796                   | 57.7                  |

**Supplemental Table 7.** Genome sequencing summary table for plants used in this study. DNA from three independent non-irradiated progenitor F<sub>2</sub> lines (F<sub>2</sub>-1 to -3), six FN-induced elongated hypocotyl mutants E71, E99, E125, E128, E138 and E216 (M<sub>3</sub> generation) and two M<sub>4</sub> generation E99 and E125 plants were sequenced along with the DNA from the progenitor line using Illumina sequencing technology. Several lanes of 36, 51, 75, 76, 90 and/or 101 bp paired-end runs were generated for each line. Between 34 and 176 million reads were obtained for each plant lineage equating to 24 – 85 fold sequence coverage (raw sequencing data) for each genome and 17 – 58 fold sequence coverage (aligned data) for each genome.. \*The parental reference genome size of 119,649,590 bp was used to determine genome fold coverage.
